# Supplementary material for: The stem cell organisation, and the proliferative and gene expression profile of Barrett's epithelium, replicates pyloric-type gastric glands
Source: HighWire-hosted journal article supplement (doi:10.1136/gutjnl-2013-306508), 2014-02-18
Supplement: gutjnl-2013-306508supp_figure.pdf [file gutjnl-2013-306508supp_figure.pdf]

Supplementary Figures

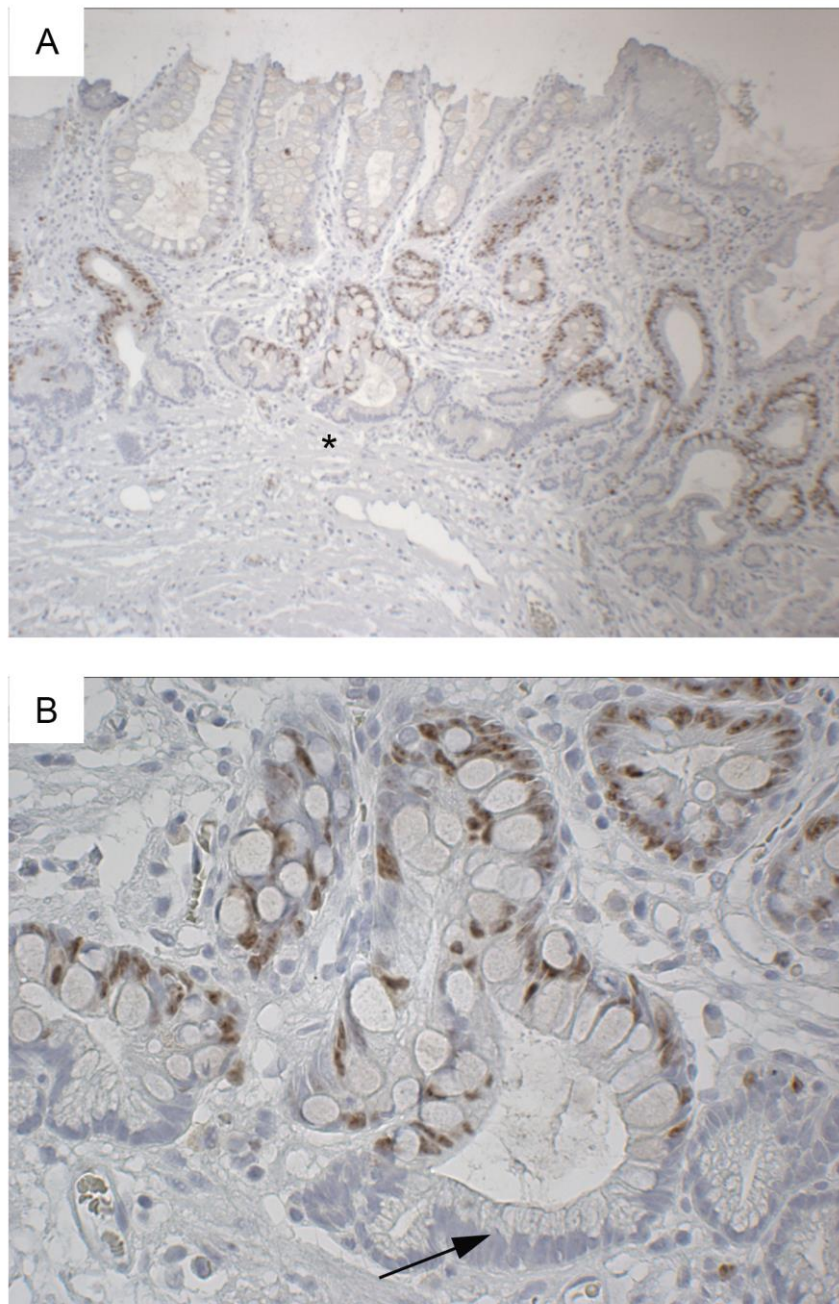

Supplementary Figure 1.

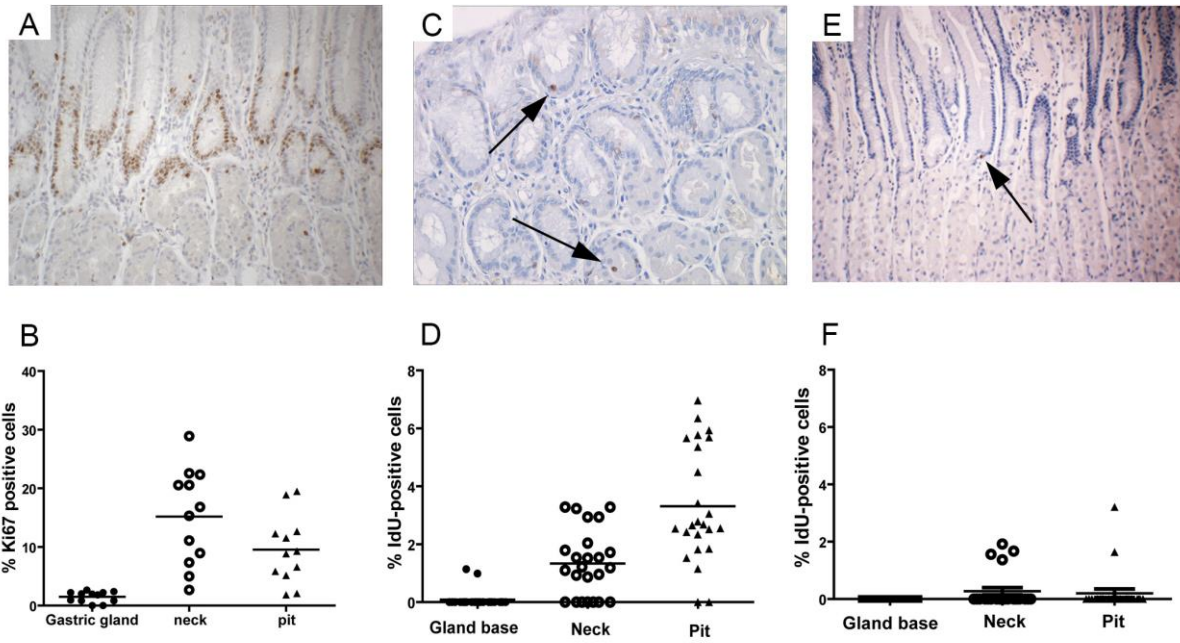

Supplementary Figure 2.

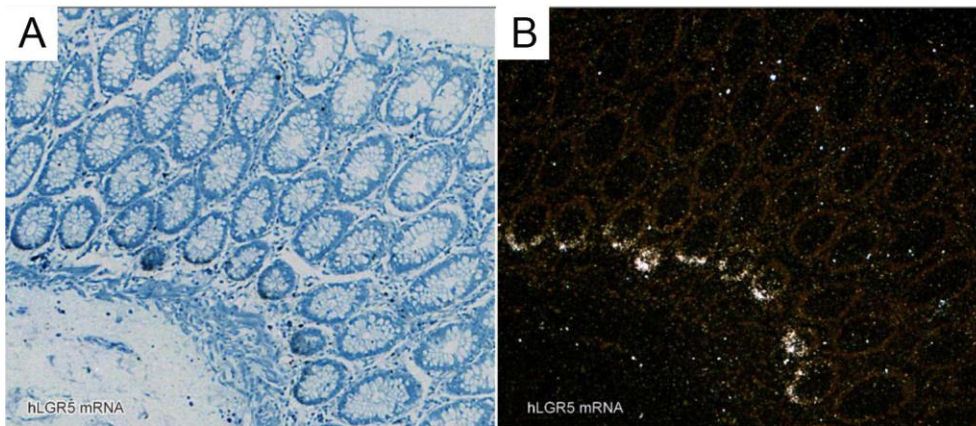

Supplementary Figure 3.

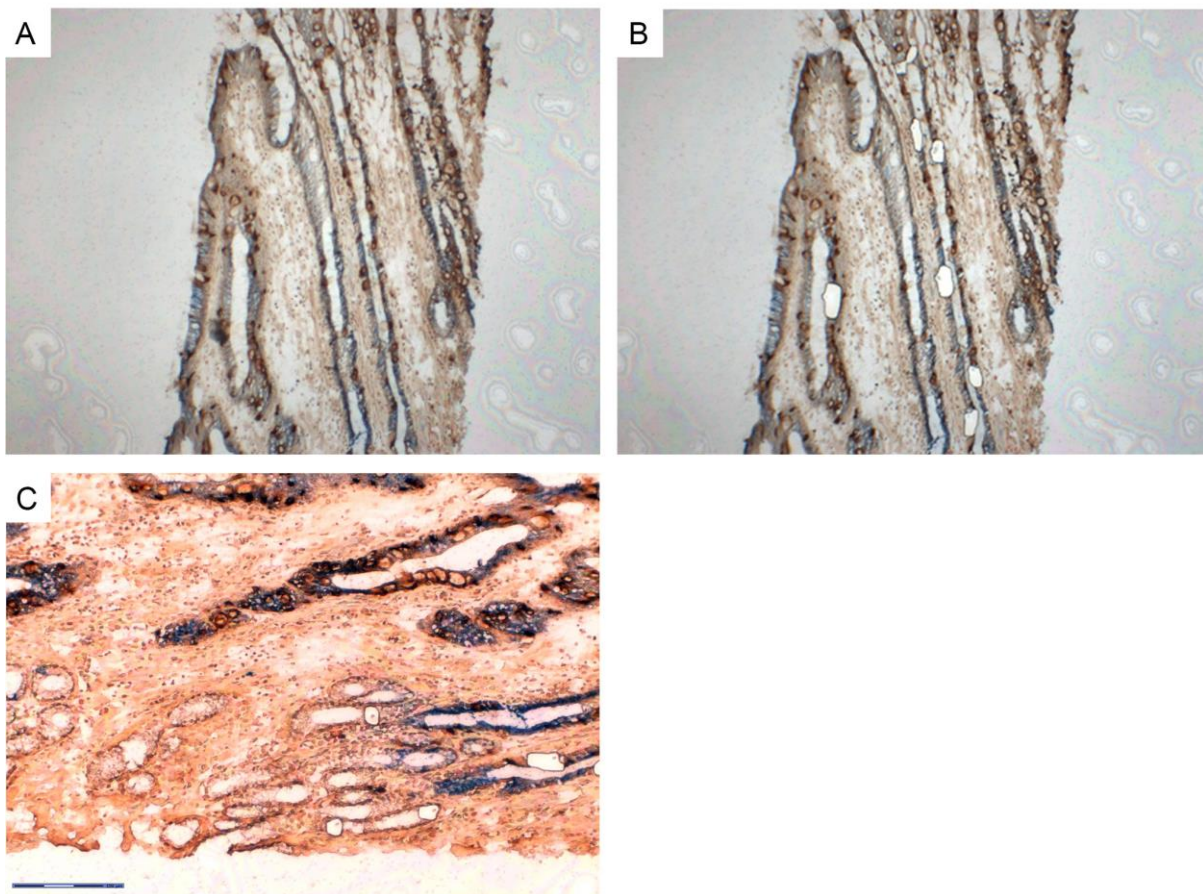

Supplementary Figure 4.

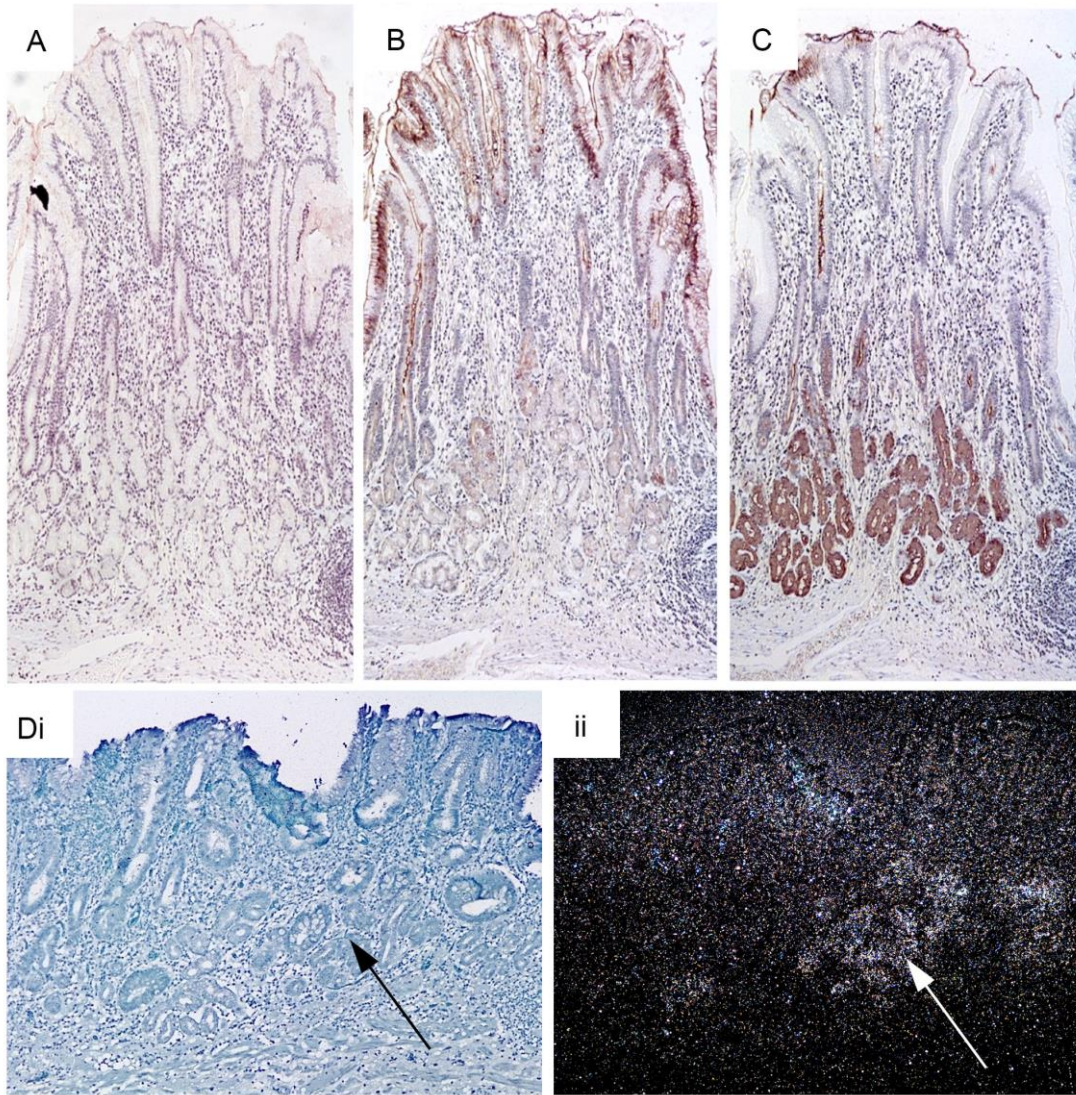

Supplementary Figure 5.

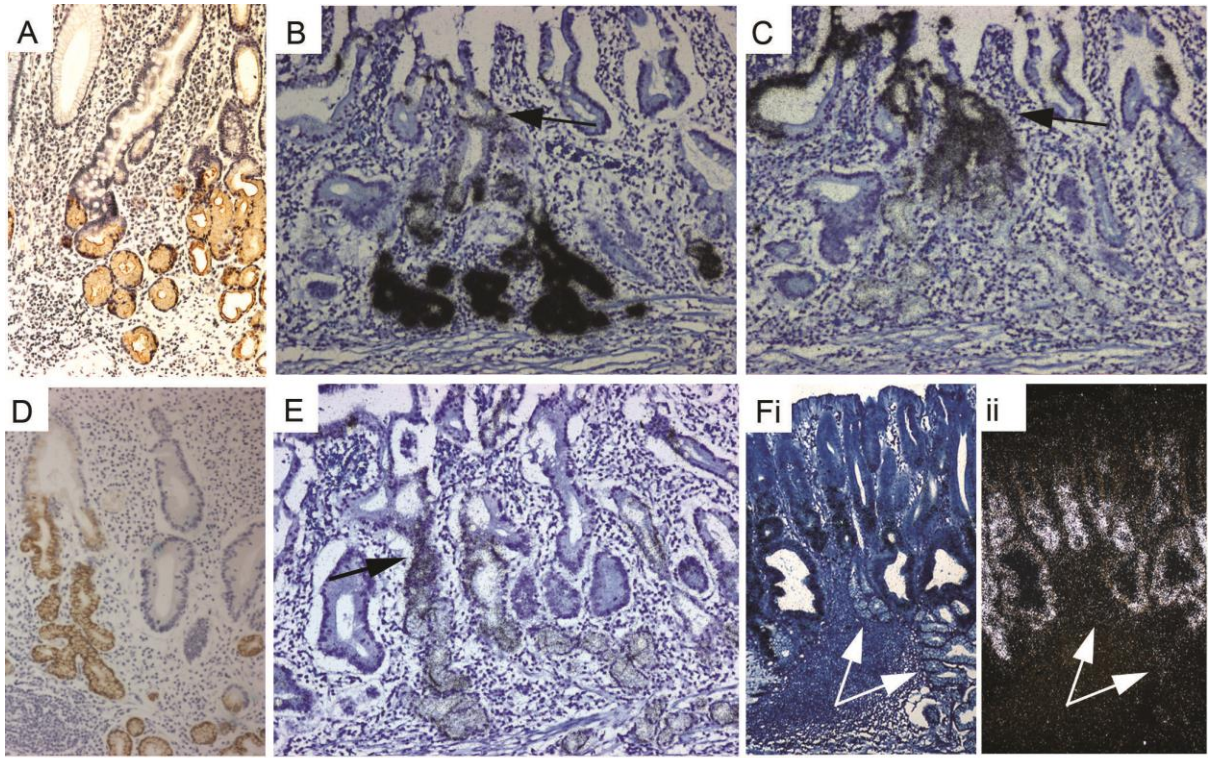

Supplementary Figure 6.
